# Supplementary material for: Latest development of approved COVID-19 drugs and COVID-19 drugs undergoing late stage clinical trials
Source: Frontiers journal article supplement (doi:10.3389/fddsv.2023.1304129), 2023-12-01
Supplement: Table_2.docx [file Table_2.docx]

**Supplementary Table 2. Detailed information about COVID-19 drugs undergoing late stage clinical trials.**

| **Drug(s)** | **ClinicalTrials.gov identifier** | **Title** | **The mechanism of the drug(s)** | **Institution** | **Target population (key inclusion criteria)** | **The design of the clinical trial** | **Relevant information** |
| --- | --- | --- | --- | --- | --- | --- | --- |
| VIR-7831 (sotrovimab) | NCT04913675 | Intramuscular VIR-7831 (Sotrovimab) for Mild/Moderate COVID-19. Substudy: Intravenous Single Ascending Dose VIR-7831 (Sotrovimab) for Mild/Moderate COVID-19 | The drug is essentially a monoclonal antibody. Monoclonal antibodies (mAbs) are laboratory‐produced molecules derived from the B cells of an infected host. They attach to the COVID‐19 virus and stop it from entering and replicating in human cells, which helps to fight the infection. | Sponsors and Collaborators: Vir Biotechnology, Inc., GlaxoSmithKline | People aged over 12 (Child, Adult, Older Adult) are eligible. Participants must have a positive SARS-CoV-2 test result and oxygen saturation ≥94% on room air and have COVID-19 symptoms and be less than or equal to 7 days from onset of symptoms. | Parent study: The study assesses the efficacy, safety, and tolerability of monoclonal antibody VIR-7831 (sotrovimab) given intramuscularly versus intravenously for the treatment of mild/moderate coronavirus disease 2019 (COVID-19) in high-risk non-hospitalized patients.  Sub-study: Safety substudy assesses the safety and tolerability of single ascending dose monoclonal antibody VIR-7831.  Study type: Interventional (Clinical Trial), phase 3  Actual enrollment: 973  Methods: Randomized allocation, using the intervention model of parallel assignment. Monitor the progression of COVID-19 in Main Study. Record adverse events (AEs), serious adverse events (SAEs), adverse events of special interest (AESIs), and disease related events (DREs) in Safety Sub-study.  Date: June 10, 2021 (actual study start date)-August 2023 (estimated study completion date) | In September 2021, Kreuzberger N, Hirsch C et al. published a review about SARS‐CoV‐2‐neutralising monoclonal antibodies on Cochrane Database System Review, emphasizing that the evidence to prove mAbs are appropriate drugs for treatment of Covid-19 is not sufficient.https://www.cochranelibrary.com/cdsr/doi/10.1002/14651858.CD013825.pub2/full  The latest results for the clinical trial are available on ClinicalTrials.gov, however, the Quality Control (QC) review has not concluded. |
| Bamlanivimab | NCT04796402 | A Study to Assess if a Medicine Called Bamlanivimab is Safe and Effective in Reducing Hospitalization Due to COVID-19 (B-EPIC) | Bamlanivimab is in a class of medications called monoclonal antibodies. It works by blocking the action of a certain natural substance in the body to stop the spread of the virus.https://medlineplus.gov/druginfo/meds/a620062.html | Sponsors and Collaborators: Fraser Health, Fraser Health Authrority Department of Evaluation and Research Services, Surrey Memorial Hospital Clinical Research Unit, Centre for Health Evaluation and Outcome Sciences, Surrey Hospital Foundation, BC Support Unit, University of British Columbia, Ministry of Health, British Columbia, Clinical Trials BC (part of the BC Academic Health Science Network) | People aged over 18 (Adult, Older Adult) are eligible. Participants should not be hospitalized and should have one or more mild COVID-19 symptoms and within 10 days from onset. | The purpose of this research is to test whether a new medication called bamlanivimab is safe and effective at reducing the need for hospitalization due to COVID-19.  Study type: Interventional (Clinical Trial), phase 4  Estimated enrollment: 576  Methods: Randomized allocation, using the intervention model of parallel assignment. Record any incidence of admission to hospital for >24 hours in the 28 days following the first positive test for SARS-CoV2.  Date: March 17, 2021 (actual study start date)-December 31, 2021 (estimated study completion date) | On April 16, 2021, the US Food and Drug Administration canceled the Emergency Use Authorization (EUA) for bamlanivimab injection for use alone in the treatment of COVID-19. Because of the increase in variants of the SARS-CoV-2 virus that are resistant to using bamlanivimab alone. Bamlanivimab injection in combination with etesevimab injection continues to be authorized under an EUA for the treatment of COVID-19.https://medlineplus.gov/druginfo/meds/a620062.html  In the US, bamlanivimab (given along with etesevimab) is also being allowed to be used to help prevent COVID-19 infection in people who have a high risk for infection after exposure to someone infected with COVID-19. Some conditions that increase risk of infection after exposure include: not being fully vaccinated, having had close contact, or being at high risk of close contact due to your housing conditions (such as a nursing home or prison).https://www.webmd.com/drugs/2/drug-180355/bamlanivimab-intravenous/details  No Study Results Posted on ClinicalTrials.gov for this Study.  Studies a U.S. FDA-regulated Drug Product: Yes |
| Ultomiris (Ravulizumab) | NCT04570397 | C5 Complement Inhbition Using Ravulizumab for the Treatment of COVID-19 Induced Thrombotic Microangiopathy | Ultomiris (Ravulizumab), is a monoclonal antibody that specifically targets terminal complement products and is proposed for the treatment of COVID-19 induced microvasculature injury and endothelial damage leading to thrombotic microangiopathy (TMA) causing acute kidney injury (AKI).  Ravulizumab causes immediate and sustained inhibition of the terminal complement cascade. The use of ravulizumab could ameliorate COVID-19 induced kidney injury due to TMA, shorten hospital stay, and improve the overall survival.  As it binds to C5 and impedes the cleavage of C5 by C5 convertase to generate C5a and membrane attack complex, ravulizumab could possibly improve the renal function in COVID 19 induced TMA and potentially improve overall survival, due to similar pathophysiology in the microvasculature of the kidney. | Sponsors and Collaborators: Brigham and Women's Hospital | Ravulizumab is to be used for participants with a confirmed diagnosis of COVID-19 who clinically or diagnostically present with deteriorating renal function.  People aged 18 to 85 (Adult, Older Adult) are eligible. A clinical diagnosis of thrombotic microangiopathy will then be applied to include the following criteria: i) D-dimer > 100% the upper limit of the reference range and ii) serum creatinine >25% of the normal range or iii) >25% increase from patient's baseline serum creatinine. | There remains an unmet clinical need to investigate this approach with a randomized controlled trial to determine if complement cascade inhibition can improve the clinical outcome for COVID 19 induced acute kidney injury as measured by improvement of renal function and decline in the overall morbidity and mortality.  Study type: Interventional (Clinical Trial), phase 3  Estimated Enrollment: 32  Methods: Randomized allocation, using the intervention model of parallel assignment. Assess the efficacy of ravulizumab to ameliorate SARS-CoV-2 (COVID-19)-induced acute kidney injury manifesting as thrombotic microangiopathy (Time Frame: 30 days).  Date: December 18, 2020 (actual study start date)-November 2023 (estimated study completion date) | No Study Results Posted on ClinicalTrials.gov  This study evaluated the efficacy, safety, pharmacokinetics, and pharmacodynamics of ravulizumab administered in adult participants with coronavirus disease 2019 (COVID-19) severe pneumonia, acute lung injury, or acute respiratory distress syndrome.  Studies a U.S. FDA-regulated Drug Product: Yes |
| MAD0004J08 | NCT04952805 | Randomized, Placebo-controlled, Double-blind, Multicenter, Seamless Adaptive Phase II-III Clinical Trial to Select the Dose and Evaluate Safety and Efficacy of MAD0004J08 Monoclonal Antibody in Adult Patients With Recently Diagnosed Asymptomatic to Moderately Severe COVID-19 | MAD0004J08, the experimental drug, is a potent neutralizing IgG1 monoclonal antibody (mAb) targeting the spike protein of SARS-CoV-2. MAD0004J08 blocks viral attachment and entry into human cells and neutralizes the virus. | Sponsors and Collaborators: Toscana Life Sciences Sviluppo s.r.l.  Principal Investigator: Simone Lanini | The target study population is adult patients ≥ 18 years of age with recently diagnosed (≤ 3 days from 1st positive swab taken) asymptomatic to moderately severe COVID-19 at baseline. | The goals of this Phase II-III seamless adaptive clinical trial are:  ·Stage-1 (Phase II) - Select one dose level for progression to Stage-2 Stage-1  ·Stage-2 (Phase III) - Provide confirmatory evidence of safety and efficacy for regulatory approval.  Study type: Interventional (Clinical Trial), phase 2&3  Estimated Enrollment: 800  Methods: Randomized allocation, using the intervention model of parallel assignment.  Date: June 6, 2021 (actual study start date)-August 31, 2022 (estimated study completion date) | MAD0004J08 is a potent Fc-engineered monoclonal antibody (mAb) able to neutralize in vitro all current SARS-CoV-2 variants of concern (VoCs) including the omicron variant even if with significantly reduced potency. A single dose administration of MAD0004J08 via intramuscular (i.m.) route is safe and well tolerated, and also sufficient to effectively neutralize major SARS-CoV-2 variants of concern (alpha, beta, gamma and delta). MAD0004J08 can be a major advancement in the prophylaxis and clinical management of COVID-19.https://www.nature.com/articles/s41467-022-29909-x  No Study Results Posted on ClinicalTrials.gov |
| Peginterferon Lambda-1A | NCT04967430 | TOGETHER-Toronto: A Phase III Randomized, Double-blind, Placebo-controlled, Multicenter, Trial to Evaluate the Effect of Peginterferon Lambda for the Treatment of COVID-19 | Interferon (IFN) lambda is one of the fundamental responses of the innate immune system. Peginterferon lambda is a long-acting form that has been studied extensively in human trials in viral hepatitis, confirming it safety and tolerability. It is particularly attractive for consideration in the use of acute respiratory illness due to the high expression of the lambda receptor in lung epithelia. | Sponsors and Collaborators: University Health Network, Toronto  Principal Investigator: Jordan Feld | People aged over 18 (Adult, Older Adult) are eligible. Patients should be symptomatic and within 7 days of symptom onset and have a high risk of severe disease. | The objective of the study is to evaluate peginterferon-lambda in ambulatory patients with mild to moderate COVID-19.  Study type: Interventional (Clinical Trial), phase 3  Estimated enrollment: 763  Methods: Randomized allocation, using the intervention model of parallel assignment. Record the COVID-19 related urgent care visit, emergency room assessment, hospitalization or death by Day 28 (Primary efficacy endpoint), SARS-CoV-2 RNA negativity (Primary virological endpoint), and treatment-emergent and treatment-related serious adverse events (Primary safety endpoint) (time frame: day 0 to day 28).  Date: August 27, 2021 (actual study start date)-June 30, 2022 (estimated study completion date) | Jagannathan P et al. have conducted a phase 2 trial on Peginterferon Lambda-1A. They found that eginterferon Lambda-1a, while safe, neither reduced time to cessation of viral shedding nor symptom duration in outpatients with uncomplicated COVID-19.https://www.nature.com/articles/s41467-021-22177-1  A study published in New England Journal of Medicine in February 9, 2023 showed that a single dose of pegylated interferon lambda is significantly effective to outpatients with Covid-19, decreasing the incidence of hospitalization or an emergency department visit among the patients.  https://www.nejm.org/doi/full/10.1056/NEJMoa2209760  https://medicalxpress.com/news/2023-02-single-dose-treatment-covid-hospitalization-high-risk.html  No Study Results Posted on ClinicalTrials.gov |
| Atazanavir, sofosbuvir, daclatasvir | NCT04468087 | Antiviral for Adult Patients Hospitalized for SARS-CoV-2 Infection: a Randomized, Phase 2/3, Multicenter, Placebo Controlled, Adaptive, Multi-arm, Multi-stage Clinical Trial - Coalition Brazil COVID-19 IX: REVOLUTIOn |  | Sponsors and Collaborators: Hospital do Coracao  Principal Investigator: Israel S Maia, MSc HCor Research Institute | People aged 18 to 90 (Adult, Older Adult) are eligible.  Adults (≥ 18 years) hospitalized with COVID-19: SARS-CoV-2 positive RT-PCR or Antigen test; Typical clinical history and chest CT with typical findings, pending RT-PCR for SARS-CoV-2; Symptom duration <= 9 days; SpO2 <= 94% in room air or need for supplemental oxygen to maintain SpO2> 94%. | The study aims to evaluate the efficacy of treatments with atazanavir, sofosbuvir and daclatasvir in Covid-19 patients.  Study type: Interventional (Clinical Trial), phase 2&3  Actual Enrollment: 256  Methods: Randomized allocation, using the intervention model of parallel assignment. Phase II: change in the slope of SARS-COV 2 viral load (Time Frame: days 3, 6 and 10 after randomization). Phase III: Number of free days from respiratory support (Time Frame: 15 days).  Date: February 15, 2021 (actual study start date)-December 31, 2022 (estimated study completion date) | No Study Results Posted on ClinicalTrials.gov |
| Corticosteroids | NCT04530409 | Timing of Corticosteroids in COVID-19, II. Post COVID-19 Follow-up | The 3C-like proteinase on SARS-CoV-2 (nsp5) inhibits HDAC2 transport into the nucleus, and so impairs the way in which it mediates inflammation and cytokine responses, so activation of histone deacetylase by dexamethasone may directly oppose the action of SARS-CoV-2. | Sponsors and Collaborators: ClinAmygate  Investigators: Emad R Issak, Assalam Clinics (Principal investigator) | People aged over 18 (Adult, Older Adult) are eligible. The severity of the participants should be mild or moderate. | The clinical trial studies the timing of corticosteroid administration, which is very important in COVID19 cases for the recovery and decreases the mortality. Immune suppression is vital for patients with the most severe COVID-19 symptoms. However, improper timing of immune suppression will cause negative effects.  Study type: Interventional (Clinical Trial), phase 4  Actual enrollment: 752  Methods: Randomized allocation, using the intervention model of parallel assignment. Measure the percentage of cases that will need hospitalization and that will need oxygen supplementation (time frame: 10 days) and 28-days mortality.  Date: March 20, 2021 (actual study start date)-March 15, 2023 (estimated study completion date) | Systemic Corticosteroids: Selected Clinical Data  https://www.covid19treatmentguidelines.nih.gov/tables/systemic-corticosteroids-data/  Multiple randomized trials indicate that systemic corticosteroid therapy improves clinical outcomes and reduces mortality in hospitalized patients with COVID-19 who require supplemental oxygen presumably by mitigating the COVID-19-induced systemic inflammatory response that can lead to lung injury and multisystem organ dysfunction. The COVID-19 Treatment Guidelines Panel’s (the Panel) recommendations for the use of corticosteroids in hospitalized patients with COVID-19 are based on results from these clinical trials.  https://www.covid19treatmentguidelines.nih.gov/therapies/immunomodulators/corticosteroids/  No Study Results Posted on ClinicalTrials.gov for this Study. |
| Actemra (tocilizumab) | NCT04372186 | A Randomized, Double-Blind, Placebo-Controlled, Multicenter Study to Evaluate the Efficacy and Safety of Tocilizumab in Hospitalized Patients With COVID-19 Pneumonia | Tocilizumab is a monoclonal antibody that targets both soluble and membrane bound IL-6 receptors, preventing IL-6 binding and reducing IL-6 signaling. It have been used for treatment of COVID-19 related acute respiratory distress syndrome (ARDS).  https://covidebm.umn.edu/evidence-based-therapies/tocilizumab | Sponsors and Collaborators: Genentech, Inc.  Investigator: Hoffmann-La Roche (study director) | People aged over 18 (Adult, Older Adult) are eligible. Participants should be hospitalized, confirmed to have Covid-19 pneumonia, with SpO2 < 94% while on ambient air. | The study evaluates the efficacy and safety of tocilizumab (TCZ) with standard of care (SOC) in hospitalized participants with COVID-19 pneumonia.  Study type: Interventional (Clinical Trial), phase 3  Actual enrollment: 377  Methods: Randomized allocation, using the intervention model of parallel assignment. Record cumulative proportion of participants who died or required mechanical ventilation by day 28.  Date: May 14, 2020 (actual study start date)-December 1, 2021 (estimated study completion date) | Salama C, Han J, et al. have reported that tocilizumab reduces the probability that patients will progress to mechanical ventilation or death. However, it does not increase the survival. The report is supported by Genentech.  https://www.nejm.org/doi/10.1056/NEJMoa2030340  The latest results for the clinical trial are available on ClinicalTrials.gov. |
| NCT05002517 | Randomized, Unicentric, Open, Controlled Clinical Trial, in Phase Iii, to Demonstrate the Effectiveness of Tocilizumab Against Systemic Corticotherapy in Patients Admitted by Covid-19 With Bilateral Pneumonia and Poor Evolution | It is postulated that TOCI and other IL-6 inhibitors may exert a positive effect on COVID-19 through modulation of IL-6, and disruption of the cytokine storm seen in severe cases.  https://www.va.gov/formularyadvisor/DOC_PDF/FAQ_EUA_Tocilizumab_COVID-19_VA_FAQ_July_2021.pdf | Sponsors and Collaborators: Asociacion Instituto Biodonostia | People aged 18 to 99 (Adult, Older Adult) are eligible. Participants should have bilateral pneumonia produced by SARS-CoV-2 without response in 48-72 hours after starting the treatment used according to the local protocol and persistently elevated inflammatory markers. | The study aims to demonstrate the effectiveness of tocilizumab against systemic corticosteroids. Both treatments added to supportive treatment in patients admitted for COVID-19 with bilateral pneumonia and poor evolution.  Study type: Interventional (Clinical Trial), phase 3  Estimated enrollment: 60  Methods: Randomized allocation, using the intervention model of parallel assignment. Record respiratory situation based on the PaO2 / FiO2 ratio, immune hyperactivation situation and mechanical ventilation.  Date: July 31, 2021 (actual study start date)-October 31, 2021 (estimated study completion date) | In hospitalized patients with Covid-19 pneumonia who were not receiving mechanical ventilation, tocilizumab reduced the likelihood of progression to the composite outcome of mechanical ventilation or death, but it did not improve survival.  https://www.nejm.org/doi/10.1056/NEJMoa2030340  No Study Results Posted on ClinicalTrials.gov  The efficacy of tocilizumab (TOC), monoclonal antibody against interleukin-6 (IL-6) receptor, in patients with coronavirus disease-2019 (COVID-19) patients has led to conflicting results.  https://onlinelibrary.wiley.com/doi/10.1002/jmv.26509 |
| Lenzilumab | NCT04351152 | A Phase 3 Randomized, Placebo-Controlled Study of Lenzilumab in Hospitalized Patients With Severe and Critical COVID-19 Pneumonia | Anti-GM-CSF monoclonal antibodies (mAbs) may mitigate inflammation by inhibiting this signaling axis upstream and thus minimizing downstream production of numerous pro-inflammatory mediators involved in the pathogenesis of COVID-19. | Sponsors and Collaborators: Humanigen, Inc.  Investigators: Cameron Durrant (Study Director) | People aged over 18 (Adult, Older Adult) are eligible. Participants should have ①virologic confirmation of SARS-CoV-2 infection via any FDA authorized diagnostic test for SARS-CoV-2; ②pneumonia diagnosed by Chest X-ray or Computed Tomography revealing infiltrates consistent with pneumonia; ③SpO2 ≤ 94% on room air and/or require low-flow supplemental oxygen and/or require high-flow oxygen support or NIPPV; ④hospitalized, not requiring invasive mechanical ventilation during this hospitalization. | The primary objective of this study is to assess whether the use of lenzilumab in addition to current standard of care can alleviate the immune-mediated cytokine release syndrome (CRS) and improve ventilator-free survival in hospitalized subjects with severe or critical COVID-19 pneumonia.  Study type: Interventional (Clinical Trial), phase 3  Actual enrollment: 520  Methods: Randomized allocation, using the intervention model of parallel assignment. Record ventilator-free survival of the patients (time frame: up to day 28).  Date: May 5, 2020 (actual study start date)-March 2021 (estimated study completion date) | Gimsilumab, lenzilumab, namilumab, and otilimab target granulocyte-macrophage colony-stimulating factor (GM-CSF) directly, neutralizing the biological function of GM-CSF by blocking the interaction of GM-CSF with its cell surface receptor.  https://www.covid19treatmentguidelines.nih.gov/therapies/immunomodulators/gm-csf-inhibitors/  No Study Results Posted on ClinicalTrials.gov  Studies a U.S. FDA-regulated Drug Product: Yes |
| Kineret (anakinra) | NCT04362111 | Early Treatment of Cytokine Storm Syndrome in Covid-19 | Anakinra is in a class of medications called interleukin antagonists. It works by blocking the activity of interleukin, a substance in the body that causes inflammation.  https://medlineplus.gov/druginfo/meds/a602001.html | Sponsors and Collaborators: University of Alabama at Birmingham  Principal Investigator: Walter W Chatham, MD, University of Alabama at Birmingham | People aged 18 to 80 (Adult, Older Adult) are eligible. Participants should have molecular (pcRNA) diagnosis of SARS-CoV-2 infection, chest imaging studies consistent with Covid-19 pneumonia, history of fever >38 degrees C and hyperferritinemia (>700 ng/ml). | The aims of the study are: ①to determine whether rapidly assayed early clinical laboratory markers of CSS in patients admitted to the hospital with respiratory compromise in the setting of Covid-19 infection can accurately identify patients with CSS as defined by validated CSS case definitions; ②to determine whether early treatment with rhIL-1Ra (anakinra) in patients admitted to the hospital with markers of CSS improves or prevents deterioration of respiratory dysfunction and prevents the development of respiratory failure requiring mechanical ventilation.  Study type: Interventional (Clinical Trial), phase 3  Actual enrollment: 15  Methods: Randomized allocation, using the intervention model of parallel assignment. Record percentage of patients discharged from the hospital alive and without the need for mechanical ventilation (time frame: variable up to day 28).  Date: July 29, 2020 (actual study start date)-April 1, 2023 (estimated study completion date) | Anakinra is authorized for the treatment of coronavirus disease 2019 (COVID-19 infection) in hospitalized adults who require supplemental oxygen, a ventilator, or who need extracorporeal membrane oxygenation (ECMO; a device that adds oxygen to the blood). For the treatment of COVID-19, anakinra is given once a day for 10 days.  https://medlineplus.gov/druginfo/meds/a602001.html  Website of Anakinra:https://www.kineretrx.com/  No Study Results Posted on ClinicalTrials.gov  Studies a U.S. FDA-regulated Drug Product: Yes |
| Fostamatinib | NCT04629703 | Double-Blind, Randomized, Placebo-Controlled, Multi-Center Phase 3 Study to Evaluate the Efficacy and Safety of Fostamatinib in COVID-19 Subjects | Fostamatinib is an oral SYK inhibitor that is US Food and Drug Administration-approved for the treatment of chronic idiopathic thrombocytopenic purpura. R406, the active metabolite of fostamatinib, inhibits both the release of proinflammatory cytokines (IL-1β, IL-6, IL-8, tumor necrosis factor, and IL-10) from macrophages and platelet-mediated thrombus formation provoked by anti-spike immune complexes (antigen/antibody complexes) predominately in an FcγRIIA-dependent manner. Further, R406 has been shown to abrogate the release of neutrophil extracellular traps (NETs) when healthy neutrophils were stimulated with plasma from patients with COVID-19.  https://academic.oup.com/cid/article/75/1/e491/6358811?login=true | Sponsors and Collaborators: Rigel Pharmaceuticals | People aged 18 to 100 (Adult, Older Adult) are eligible. Participants are hospitalized COVID-19 subjects without respiratory failure who are either not receiving any oxygen therapy or are receiving supplemental oxygen via mask or nasal prongs. | The primary objective of this study is to evaluate the efficacy of fostamatinib when used in combination with standard of care (SOC) in subjects hospitalized with COVID-19 and requiring oxygen supplementation, as measured by days on oxygen.  Study type: Interventional (Clinical Trial), phase 3  Estimated Enrollment: 308  Methods: Randomized allocation, using the intervention model of parallel assignment. Record the number of days of patients on oxygen from randomization on Day 1 to Day 29.  Date: February 22, 2021 (actual study start date)-October 2022 (estimated study completion date) | Phase 2 clinical trial (https://clinicaltrials.gov/ct2/show/NCT04579393): For COVID-19 requiring hospitalization, the addition of fostamatinib to standard of care was safe and patients were observed to have improved clinical outcomes compared with placebo. These results warrant further validation in larger confirmatory trials.  https://academic.oup.com/cid/article/75/1/e491/6358811?login=true  No Study Results Posted on ClinicalTrials.gov  Studies a U.S. FDA-regulated Drug Product: Yes |
| Cannabidiol | NCT04467918 | Cannabidiol (CBD) in Patients With Mild to Moderate Symptoms of Coronavirus 2019: A Randomized, Double-blind, Placebo-controlled Clinical Trial | Owing to its anti-inflammatory properties and antiviral “in vitro” effect against severe acute respiratory syndrome coronavirus 2 (SARS-CoV-2), cannabidiol (CBD) has been proposed as a potential treatment for coronavirus disease 2019 (COVID-19). | Sponsor:  University of Sao Paulo  Collaborators:  Conselho Nacional de Desenvolvimento Científico e Tecnológico, Fundação de Amparo à Pesquisa do Estado de São Paulo | People aged over 18 (Adult, Older Adult) are eligible. Participants should be detected with SARS-CoV-2 infection confirmed in upper or lower respiratory tract secretion, with mild or moderate manifestations of Covid-19. | The aim of this work is to conduct a randomized, double-blind, placebo-controlled clinical trial to assess the efficacy and safety of cannabidiol (CBD - 300 mg a day) in patients infected with SARS-CoV-2. The drug targets the patients with mild and moderate forms of SARS-CoV-2.  Study type: Interventional (Clinical Trial), phase 3  Estimated Enrollment: 100  Methods: Randomized allocation, using the intervention model of parallel assignment. Evaluate whether the drug is able to prevent severe/critical stage of Covid-19. Record the time to Covid-19 symptoms relief and number of participants with negative Clinical Covid-19 symptoms (time frame: up to 28 days).  Date: July 6, 2020 (actual study start date)-November 16, 2021 (estimated study completion date) | José Alexandre S Crippa et al. Concluded that daily administration of 300 mg CBD for 14 days failed to alter the clinical evolution of COVID-19. Further trials should explore the therapeutic effect of CBD in patients with severe COVID-19, possibly trying higher doses than the used in their study.  https://www.liebertpub.com/doi/10.1089/can.2021.0093  Alexandre Vallée pointed out that the possible effects of CBD through its relationship with both the WNT/β-catenin pathway and PPARγ expression should be investigated to better understand its downregulating role on the cytokine storm in SARS-CoV-2 infection, and the possible role of CBD as therapeutic complements should be investigated by clinical trials to show its effectiveness.  https://www.frontiersin.org/articles/10.3389/fimmu.2022.870787/full  No Study Results Posted on ClinicalTrials.gov |
| Leflunomide | NCT05007678 | Targeting de Novo Pyrimidine Biosynthesis by Leflunomide as a Novel Concept for the Treatment of Corona Virus Disease 2019 (COVID-19) | Leflunomide, a drug that is already licenced to treat rheumatoid arthritis, is a potent inhibitor of the enzyme human dihydroorotate dehydrogenase (DHODH), which is vital to virus replication.  This drug has dual anti-viral and anti-inflammatory properties, so it targets viral replication and suppresses host inflammatory response which plays a role at more progressive stages of infection. | Sponsors and Collaborators: Ashford and St. Peter's Hospitals NHS Trust  Investigators: Zhong Chen (CI); Isaac John; Sharma Shashank (PI), Ashford and St Peters Hospital NHS Foundation Trust | People aged 18 to 120 (Adult, Older Adult) are eligible. Patients with onset of symptoms >15 days. Laboratory (RT-PCR) confirmed infection with 2019-nCoV. | The goal of the study is to evaluate the clinical efficacy and safety of 10 days oral leflunomide treatment starting within 2 weeks of moderate to critical illness symptoms' onset in patients with confirmed COVID-19 infection.  Study type: Interventional (Clinical Trial), phase 3  Actual enrollment: 178  Methods: Randomized allocation, using the intervention model of parallel assignment. Measure ①time to clinical improvement, ②incidence of adverse events, and ③changes in virological load over time to evaluate the efficacy of the drug.  Date: September 16, 2020 (actual study start date)-July 1, 2022 (estimated study completion date) | Collaborators in China have conducted a pilot study in COVID-19 patients in Wuhan, the epicentre of China COVID-19 outbreak, with moderate clinical symptoms. This study has demonstrated feasibility with a favourable clinical outcome and good safety profile within the leflunomide treatment arm. Patients receiving leflunomide had a shorter clinical recovery time and a reduction in clinical inflammatory biomarkers with no side effects observed.  No Study Results Posted on ClinicalTrials.gov |
| Colchicine | NCT04997551 | Double Blind Randomized Clinical Trial of Use of Colchicine Added to Standard Treatment in Hospitalized Patients With Covid-19 Infection | Colchicine is an anti-inflammatory drug, which has several potential mechanisms of action, including reducing the chemotaxis of neutrophils, inhibiting inflammasome signaling, and decreasing the production of cytokines, such as interleukin-1 beta. On the early stage of Covid-19, colchicine could mitigate or prevent inflammation-associated manifestations of the disease. | Sponsors and Collaborators: Asociacion Instituto Biodonostia (Spain) | People aged 18 to 99 (Adult, Older Adult) are eligible. Patient should be hospitalized with acute symptoms compatible with SARS-CoV-2 infection and microbiologically confirmed infection by SARS-CoV-2. | The study aims to evaluate the efficacy of Colchicine in standard treatment in hospitalized patients with Covid-19 infection.  Study type: Interventional (Clinical Trial), phase 3  Actual enrollment: 752  Methods: Randomized allocation, using the intervention model of parallel assignment. Record the proportion of patients who suffer death, need for mechanical ventilation and development of respiratory distress on days +7, +14 and +30.  Date: September 8, 2020 (actual study start date)-January 1, 2022 (estimated study completion date) | No Study Results Posted on ClinicalTrials.gov |
| NCT04818489 | Impact of Colchicine on the Clinical Outcome of COVID-19 and the Development of Post-COVID-19 Pulmonary Fibrosis: Randomized Controlled Clinical Trial | Sponsors and Collaborators: ClinAmygate  Principal Investigator: Emad Issak, Ain Shams Univeristy | People aged over 18 (Adult, Older Adult) are eligible.  Patients should be confirmed to have COVID-19 clinically, radiologically and PCR. | Impact of colchicine on the clinical outcome of COVID-19 and the development of post-COVID-19 pulmonary fibrosis.  Study type: Interventional (Clinical Trial), phase 4  Actual enrollment: 260  Methods: Randomized allocation, using the intervention model of parallel assignment. Record clinical status (Time Frame: Two weeks) and Pulmonary fibrosis at week 2 and at 45 days.  Date: March 25, 2021 (actual study start date)-March 20, 2023 (estimated study completion date) | Based on the current evidence, in people hospitalised with moderate to severe COVID‐19 the use of colchicine probably has little to no influence on mortality or clinical progression in comparison to placebo or standard care alone. We do not know whether colchicine increases the risk of (serious) adverse events.  https://www.cochranelibrary.com/cdsr/doi/10.1002/14651858.CD015045/full  No Study Results Posted on ClinicalTrials.gov |
| Pirfenidone, Nintedanib | NCT04856111 | A Study of the Efficacy and Safety of Pirfenidone vs. Nintedanib in the Treatment of Fibrotic Lung Disease After Coronavirus Disease-19 Pneumonia | Pirfenidone (5-methyl-1-phenyl-2-[1H]-pyridone), is a novel anti-fibrotic agent with trivial adverse effects. Pirfenidone could inhibit apoptosis, downregulate ACE receptors expression, decrease inflammation by several mechanisms and ameliorate oxidative stress and hence protect pneumocytes and other cells from COVID-19 invasion and cytokine storm simultaneously.  https://pubmed.ncbi.nlm.nih.gov/32575019/  Nintedanib is an antifibrotic drug, inhibiting fibrogenesis across a wide range of pulmonary disorders, including connective tissue-associated interstitial lung diseases. As profibrotic pathways in post-COVID-19 pulmonary fibrosis have been considered to resemble those in autoimmune interstitial lung diseases, nintedanib might have beneficial effects in the management of the pulmonary consequences of COVID-19.  https://onlinelibrary.wiley.com/doi/10.1002/rcr2.744 | Sponsor: Postgraduate Institute of Medical Education and Research | People aged over 18 (Adult, Older Adult) are eligible. Participants should have post-COVID parenchymal involvement >10% of the lung parenchyma on visual inspection of the scans with the presence of radiologic signs of fibrosis (traction bronchiectasis/traction bronchiolectasis or honeycombing or reduced lung volumes), or have persistent reticulation or persistent consolidation despite a trial of glucocorticoids (minimum prednisolone dose of 10 mg/day, or equivalent) for a minimum period of 4 weeks after discharge for the acute COVID-19 illness. | As the final pathway of lung fibrosis appears to be common among different diffuse parenchymal lung diseases (DPLDs), it is hoped that these antifibrotic agents might be helpful in post-COVID fibrosis. The study aims to assess the efficacy and safety of pirfenidone and compare it with nintedanib in the treatment of post-COVID lung fibrosis.  Study type: Interventional (Clinical Trial), phase 4  Estimated Enrollment: 48  Methods: Randomized allocation, using the intervention model of parallel assignment. Measure the change in the forced vital capacity (FVC) of patients.  Date: March 17, 2021 (actual study start date)-November 30, 2022 (estimated study completion date) | No Study Results Posted on ClinicalTrials.gov |
| Metformin, fluvoxamine, ivermectin | NCT04510194 | COVID-OUT: Early Outpatient Treatment for SARS-CoV-2 Infection (COVID-19) |  | Sponsors and Collaborators:University of Minnesota, UnitedHealth Group, Northwestern University, Hennepin County Medical Center(Minneapolis), University of Colorado(Denver),Olive View-UCLA Education & Research Institute  Principal Investigator: Carolyn Bramante, MD University of Minnesota | People aged 30 to 85 (Adult, Older Adult) are eligible.  Main Inclusion Criteria: (1)Positive laboratory test for active SARS-CoV-2 viral infection based on local laboratory standard (i.e. +PCR) within 3 days of randomization.(2)No known history of confirmed SARS-CoV-2 infection. (3)BMI >= 25kg/m2 by self-report height/weight or >= 23kg/m2 in patients who self-identify in South Asian or Latinx background. (4)GFR>45ml/min within 2 weeks for patients >75 years old, or with history of heart, kidney, or liver failure. | The purpose of this trial is to understand whether:  (1)Metformin vs fluvoxamine vs ivermectin vs metformin+fluvoxamine vs metformin+ivermectin is superior to placebo in non-hospitalized adults with SARS-CoV-2 disease for preventing Covid-19 disease progression.  (2)To understand if the active treatment arms are superior to placebo in improving viral load, serologic markers associated with Covid-19, and gut microbiome in non-hospitalized adults with SARS-CoV-2 infection.  (3)To understand if any of the active treatment arms prevent long-covid syndrome, PASC (post-acute sequelae of SARS-CoV-2 infection).  Study type: Interventional (Clinical Trial), phase 3  Estimated Enrollment: 1350  Methods: Randomized allocation, using the intervention model of parallel assignment. Record clinical progression of participants within 14 days (Clinical progression, defined as: Emergency department visit for any COVID-19 related symptom (including hospitalization or death) or decrease in O2 saturation (≤93% on room air, or need for supplemental oxygen to maintain an O2 saturation >93%))  Date: January 1, 2021 (actual study start date)-February 14, 2023 (estimated study completion date) | No Study Results Posted on ClinicalTrials.gov |
| Ivermectin | NCT05040724 | Evaluation of the Impact of the Administration of Single Dose of Ivermectin in the Early Phase of COVID-19 on the Time to Negativation of the SARS-COV-2 Viral Load Determinated by RT-PCR | Ivermectin, an antiparasitic agent used to treat parasitic infestations, inhibits the replication of viruses in vitro. The molecular hypothesis of ivermectin's antiviral mode of action suggests an inhibitory effect on severe acute respiratory syndrome coronavirus 2 (SARS-CoV-2) replication in the early stages of infection. https://pubmed.ncbi.nlm.nih.gov/34318930/  In addition, some reports suggest that ivermectin acts by inhibiting host importin alpha/beta-1 nuclear transport proteins, which are part of a key intracellular transport process. Other studies of ivermectin have also reported potential anti-inflammatory properties, which have been postulated to be beneficial in people with COVID-19.  https://www.covid19treatmentguidelines.nih.gov/therapies/miscellaneous-drugs/ivermectin/ | Sponsor: Raincy Montfermeil Hospital Group | People aged over 18 (Adult, Older Adult) are eligible. Participants should have symptomatic COVID-19 for less than 96 hours and be tested positive for SARS-CoV-2 by RT-PCR on a nasopharyngeal sample within 48 hours of inclusion. | Unlike other studies conducted so far on COVID-19, IVERCoV will target the "viral" phase of the disease by screening patients in the city. The study evaluates the impact of the administration of single dose of Ivermectin in the early phase of COVID-19 on the time to negativation of the SARS-COV-2 Viral load.  Study type: Interventional (Clinical Trial), phase 3  Estimated Enrollment: 200  Methods: Randomized allocation, using the intervention model of parallel assignment. Record the negativation of the RT-PCR test on nasopharyngeal samples of SARS-CoV-2 (time frame: day 3). Prospective, multicenter, double-blind, randomized trial in two parallel groups:  - a control group: with administration of a placebo in addition to the usual treatment  - an experimental group: treated with ivermectin 400 µg / kg in addition to the usual treatment.  Date: May 28, 2021 (actual study start date)-June 2022 (estimated study completion date) | The use of ivermectin in the early stages of the disease has not yet been studied. The administration of the maximum authorized dose (MA) of ivermectin could at least slow down the replication of the virus in vivo before the inflammatory phase of COVID-19, and reduce the duration of symptoms as well as the risk of hospitalization of patients, especially in critical care.  Through searching for the existing study on Ivermectin irrespective of disease severity, treated in inpatient or outpatient settings, and for prevention of SARS-CoV-2 infection, Maria Popp et al. concluded that the efficacy and safety of ivermectin used to treat or prevent COVID-19 are uncertain.  https://pubmed.ncbi.nlm.nih.gov/34318930/  The FDA has not approved ivermectin for use in treating or preventing COVID-19 infection in humans. The World Health Organization (WHO) recommend not to use ivermectin in patients with COVID-19 to reduce viral replication, except in clinical trials.  https://www.drugs.com/ivermectin.html  No Study Results Posted on ClinicalTrials.gov |
| Colchicine | NCT04818489 | Impact of Colchicine on the Clinical Outcome of COVID-19 and the Development of Post-COVID-19 Pulmonary Fibrosis: Randomized Controlled Clinical Trial | Colchicine has a direct anti-inflammatory effect by inhibiting the synthesis of tumor necrosis factor alpha and IL-6, monocyte migration, and the secretion of matrix metalloproteinase-9. It suppresses secretion of cytokines and chemokines as well as in vitro platelet aggregation. All these are potentially beneficial effects that might diminish the COVID-19 inflammatory storm associated with severe cases.  https://www.covid19treatmentguidelines.nih.gov/therapies/miscellaneous-drugs/colchicine/ | Sponsors and Collaborators: ClinAmygate  Principal Investigator: Emad Issak, Ain Shams Univeristy | People aged over 18 (Adult, Older Adult) are eligible.  Patients should be confirmed to have COVID-19 clinically, radiologically and PCR. | Impact of colchicine on the clinical outcome of COVID-19 and the development of post-COVID-19 pulmonary fibrosis.  Study type: Interventional (Clinical Trial), phase 4  Actual enrollment: 260  Methods: Randomized allocation, using the intervention model of parallel assignment. Record clinical status (Time Frame: Two weeks) and Pulmonary fibrosis at week 2 and at 45 days.  Date: March 25, 2021 (actual study start date)-March 20, 2023 (estimated study completion date) | Based on the current evidence, in people hospitalised with moderate to severe COVID‐19 the use of colchicine probably has little to no influence on mortality or clinical progression in comparison to placebo or standard care alone. We do not know whether colchicine increases the risk of (serious) adverse events.  https://www.cochranelibrary.com/cdsr/doi/10.1002/14651858.CD015045/full  No Study Results Posted on ClinicalTrials.gov |
| CimetrA | NCT04802382 | A Phase III, Double-blind , Controlled Clinical Study Designed to Evaluate the Effect of CimetrA in Patients Diagnosed With COVID-19 | A preparation of CimertrA, comprising Artemisinin, Curcumin, and Boswellia, and Vitamin C in a nanoparticular formulation, is proposed as a treatment for the disease associated with the novel coronavirus SARS-CoV-2.  Experiments performed in vitro with CimetrA demonstrated the ability to reduce cytokine elevation in response to stimulation of human PBMC preparations. | Sponsors and Collaborators: MGC Pharmaceuticals d.o.o | People aged over 18 (Adult, Older Adult) are eligible. Participants should be hospitalized patients with COVID-19 of moderate stable or worsening severity not requiring ICU admission. | The study is to evaluate the effect of CimetrA in patients diagnosed with COVID-19. It is designed to include 252 adult patients who suffer from moderate COVID-19 infection.  Study type: Interventional (Clinical Trial), phase 3  Actual Enrollment: 252  Methods: Randomized allocation, using the intervention model of parallel assignment. Record clinical improvement in treatment groups [ Time Frame: up to 28 days ].  Date: June 11, 2021 (actual study start date)-April 2023 (estimated study completion date) | CimetrA, comprising Artemisinin, Curcumin, Boswellia, and Vitamin C in a nanoparticular formulation, has been studied on patients with COVID-19 in a randomized double-blind control Phase II study (MGC-006 - under a previous product name - ArtemiC). The study product demonstrated excellent safety and efficacy profiles.  MGC Pharmaceuticals, along with Swiss Pharmacan, have developed two clinically tested herbal-based products that ameliorate the more troublesome symptoms of Long COVID and COVID-19.  The first product is ArtemiC Support®, used in treating Long COVID. The product is already on the market and is being sold around the world. Recent study results demonstrated the statistically significant efficacy of ArtemiC Support® in reducing the severity of a range of Long COVID symptoms, including Dyspnea, Cough, Asthenia, Headache and Mental Confusion.  The second herbal-inspired product, CimetrA™, is in clinical trials with notable results in treating COVID-19 patients. MGC plans to complete a full safety and Pharmacokinetic profile as part of the drug registration process, so that the product can go to market.  https://www.prnewswire.com/il/news-releases/mgc-pharmaceuticals-successfully-developed-herbal-inspired-products-for-treatment-of-long-covid-and-covid-19-301629309.html  No Study Results Posted on ClinicalTrials.gov |
| Cholecalciferol (Vitamin D) | NCT05166005 | The Effect of Vitamin D Supplementation in Standard Therapy on Reducing Severity of COVID-19 Among Hospitalized Patients | Cholecalciferol (Vitamin D) is a fat-soluble vitamin that is involved in maintaining the serum calcium-phosphorus gradient.  It inhibits the proliferation of T cells and contributes to a significant decrease in the level of proinflammatory cytokines, thereby reducing the severity of immune-mediated damage. Based on the above theoretical basis, in Covid-19, vitamin D is inferred that it has the ability to prevent the severe course of coronavirus infection and even prevent it. | Sponsors and Collaborators: Federal State Budgetary Institution, V. A. Almazov Federal North-West Medical Research Centre, of the Ministry of Health | People aged 18 to 75 (Adult, Older Adult) are eligible. Patient enrolled in the study are required to show COVID-19 clinical features without Vitamin D supplementation. | The purpose of the study is ①to analyze the interlinks between serum 25(OH)D level and severity of new coronavirus infection (COVID-19) in hospitalized patients, ②to explore the effect of adding colecaciferol to standard therapy for patients in the acute period of the disease.  Study type: Interventional (Clinical Trial), phase 4  Actual enrollment: 350  Methods: Randomized allocation, using the intervention model of parallel assignment. Evaluate the severity, ICU hospitalization, outcome of the disease on 14-21 days of the patients.  Date: April 1, 2020 (actual study start date)-December 1, 2022 (estimated study completion date) | No Study Results Posted on ClinicalTrials.gov |
| Sodium Bicarbonate | NCT04655716 | Urine Alkalinisation to Prevent Acute Kidney Injury in COVID-19 | Severe acute kidney injury appears to a major part of the SARS-CoV-2 syndrome. Urine alkalinisation to prevent binding of SARS-COV-2 to renal tubular epithelial cells is a potential method which could be used to design other therapies to reduce viral binding. | Sponsors and Collaborators: Guy's and St Thomas' NHS Foundation Trust  Principal Investigator: Marlies Ostermann | People aged over 18 (Adult, Older Adult) are eligible. Participants should be confirmed Covid-19 positive and gain admission to critical care unit, with bladder catheter in situ. | The aim of the study is to explore the feasibility and safety of urine alkalinisation in critically ill patients with COVID-19.  Study type: Interventional (Clinical Trial), phase 3  Estimated enrollment: 80  Methods: Randomized allocation, using the intervention model of parallel assignment. Measure the proportion of patients treated who achieve >50% of urine measurements above pH 7.0 over the duration of intervention (Time Frame: up to 10 days after intensive care unit admission).  Date: July 19, 2021 (actual study start date)-December 31, 2022 (estimated study completion date) | No Study Results Posted on ClinicalTrials.gov |
| BACTEK-R (MV130) | NCT04363814 | A Prospective, Open-label, Randomized Pilot Study (Including a Control Group) of BACTEK-R (MV130), Administered Sublingually to Assess the Clinical Impact in Subjects With Mild Pneumonia Due to COVID-19 | BACTEK-R is a bacterial preparation that contains a mixture of Gram + and Gram - inactivated bacteria at the concentration of 300 FTU / mL (approx. 10^9 bacteria / mL). | Sponsors and Collaborators: Inmunotek S.L., BioClever 2005 S.L.  Investigators: Martín Medrano, Nicolas Batlle, Raymundo Hernández, Natalia García, M. Polanco, Guillermo Ángeles | People aged 18 to 70 (Adult, Older Adult) are eligible. Subjects should be admitted to hospital with non-severe pneumonia (CURB-65≤2) by COVID-19 and have confirmatory test for COVID-19 infection. | The study is aiming to confirm if BACTEK-R (MV130) provides clinical benefit in subjects with mild pneumonia (CURB-65≤2) by COVID-19 admitted to the hospital.  Study type: Interventional (Clinical Trial), phase 3  Estimated enrollment: 100  Methods: Randomized allocation, using the intervention model of parallel assignment. Measure clinical recovery and clinical worsening to evaluate the efficacy of the drug. Symptom will be daily record and classified as mild, moderate, severe.  Date: June 10, 2020 (actual study start date)-January 31, 2022 (estimated study completion date) | No Study Results Posted on ClinicalTrials.gov |
| Atorvastatin (40 Mg Oral Tablet) | NCT04952350 | Atorvastatin in Hospitalized COVID-19 Patients: A Randomized, Double-blinded, Placebo-Controlled, Clinical Trial | Atorvastatin is used together with diet to lower blood levels of "bad" cholesterol (low-density lipoprotein, or LDL), to increase levels of "good" cholesterol (high-density lipoprotein, or HDL), and to lower triglycerides (a type of fat in the blood).  https://www.drugs.com/atorvastatin.html | Sponsors and Collaborators: Mansoura University  Investigators: Moataz M Emara (study director) | People aged over 18 (Adult, Older Adult) are eligible. For patients who have severe and critical COVID-19. They are PCR-confirmed, clinically or radiologically diagnosed with COVID-19. | The clinical trial aims to test the efficacy of administering atorvastatin 40 mg to hospitalized COVID-19 patients for 28 days on the all-cause 28-day mortality.  Study type: Interventional (Clinical Trial), phase 3  Actual enrollment: 220  Methods: Randomized allocation, using the intervention model of parallel assignment. Measure the mortality (time frame: 28 days after randomization; 6 months after randomization).  Date: August 14, 2021 (actual study start date)-April 2022 (estimated study completion date) | Atorvastatin is classified to statins, which can lower the risk of death in patients with COVID-19, who also have a history of cardiovascular disease (CVD) and hypertension.  https://www.drugs.com/medical-answers/statins-treat-covid-19-3561651/  No Study Results Posted on ClinicalTrials.gov |
| Hydroxychloroquine Sulfate | NCT04316377 | Norwegian Coronavirus Disease 2019 Study: An Open Labeled Randomized Controlled Pragmatic Trial to Evaluate the Antiviral Effect of Chloroquine in Adult Patients With SARS-CoV-2 Infection | Highlights of SARRS-CoV-2 lifecycle and proposed mechanisms of CQ/HCQ interruption of virulence:  1) modulation of endosome or lysosome function by elevation of pH  2) Modulation of cytokine production (TNFα, etc.) and antigen presentation  3) Intervention of intracellular calcium gradients, impairing RNA replication, spike glycoprotein production, and innate inflammatory response.  https://www.sciencedirect.com/science/article/pii/S2405844020317436?via%3Dihub#fig1 | Sponsor: University Hospital, Akershus  Principal Investigator: Olav Dalgard, MD PhD, Akerhus University Hospital | People aged over 18 (Adult, Older Adult) are eligible. Patients should have moderately severe Covid-19 disease and be hospitalized for more than 48 hours. | In the current proposal, the investigators aim to investigate the virological and clinical effects of chloroquine treatment in patients with established COVID-19 in need of hospital admission.  Study type: Interventional (Clinical Trial), phase 4  Actual Enrollment: 53  Methods: Randomized allocation, using the intervention model of parallel assignment. Patients will be randomized in a 1:1 fashion to standard of care or standard of care with the addition of therapy with chloroquine. The primary outcome measure is the rate of decline in SARS-CoV-2 viral load.  Date: March 25, 2020 (actual study start date)-March 3, 2025 (estimated study completion date) | Advantages:  - In light of the evidence supporting chloroquine as a promising therapeutic in patients with COVID-19, the expected impact of the current proposal is considerable both in the short- and long-term.  - The drug is affordable and the risk of side effects is low, making it an attractive therapeutic in large proportions of the population on a global scale.  The COVID-19 Treatment Guidelines Panel recommends against the use of chloroquine and hydroxychloroquine (a less-toxic derivative of chloroquine) for the treatment of COVID-19 in patients. The ruling came after the FDA expressed concerns about the drugs' 'safety and how well they worked against the virus after earlier studies showed they promise in preventing hospitalization.  https://www.webmd.com/covid/coronavirus_chloroquine  Bhagteshwar Singh et al. have concluded that HCQ for people infected with COVID-19 has little or no effect on the risk of death and probably no effect on progression to mechanical ventilation.  https://pubmed.ncbi.nlm.nih.gov/33624299/  No Study Results Posted on ClinicalTrials.gov |
| Homeopathic Medication | NCT05104749 | Homeopathic Treatment of Post-acute COVID-19 Syndrome- A Pilot Randomized Controlled Trial | Homeopathic medicines are prepared according to standardized methods as specified by the Homeopathic Pharmacopoeia of the United States (HPUS). | Sponsors and Collaborators: Southwest College of Naturopathic Medicine, Samueli Institute for Information Biology  Principal Investigator: Elizabeth Rice | People aged 18 to 64 (Adult) are eligible. Participants should have: positive PCR test result for SARS-CoV-2, persistent fatigue for a minimum of 60 days since diagnosis of Covid-19, a fatigue score above 21 in the Fatigue Assessment Scale upon enrollment, and full Covid-19 vaccination; i.e. 2 weeks after a two-dose series or 2 weeks after a single-dose vaccine. | The study aims to determine whether an individually prescribed homeopathic medicine has an effect greater than a placebo and is a viable treatment option to improve fatigue and quality of life for patients suffering from the symptoms of Post-acute COVID-19 Syndrome.  Study type: Interventional (Clinical Trial), phase 3  Estimated enrollment: 62  Methods: Randomized allocation, using the intervention model of parallel assignment. Measure Fatigue Assessment Scale (FAS), 36 Item Short Form Survey (SF 36) and their change (time frame: 4, 8, and 12 weeks).  Date: September 15, 2021 (actual study start date)-September 30, 2022 (estimated study completion date) | No Study Results Posted on ClinicalTrials.gov |
| K-237 0.3-0.4mg/kg (once daily) | NCT05056883 | A Phase III Confirmatory Study of K-237-Multi-regional, Multi-center, Placebo Controlled, Randomized, Double Blind, Parallel Group Controlled Trial in Patients With Mild COVID-19 | -- | Sponsors and Collaborators: Kowa Company, Ltd. | People aged over 12 (Child, Adult, Older Adult) are eligible. Patients should confirmed positive for SARS-CoV-2 by antigen test or RT-PCR test using specimens collected within 120 hours prior to obtaining consent, with a room air oxygen saturation (SpO2) of 96% or higher at the time of the screening test, and they should have fevers (37.5 degrees Celsius or higher) and/or at least one of the following symptoms of Score 2 or higher at a screening test: Myalgia, sore throat, diarrhea, nausea, vomiting, cough, and shortness of breath. | The efficacy and safety of K-237 0.3-0.4 mg/kg orally administered once daily for 3 days will be evaluated in patients with mild COVID-19 in this study.  Study type: Interventional (Clinical Trial), phase 3  Actual enrollment: 1030  Methods: Randomized allocation, using the intervention model of parallel assignment. Record the time from the start of study drug administration to 168 hours until the clinical symptoms reach an improving trend [ Time Frame: Day1～11 after administration ]  Date: October 22, 2021 (actual study start date)-December 31, 2022 (estimated study completion date) | No Study Results Posted on ClinicalTrials.gov |
| Biological: LY3819253  Drug: Placebo  Biological: Remdesivir  Biological: VIR-7831  Biological: BRII-196/BRII-198  Biological: AZD7442  Drug: MP0420  Drug: PF-07304814 | NCT04501978 | A Multicenter, Adaptive, Randomized, Blinded Controlled Trial of the Safety and Efficacy of Investigational Therapeutics for Hospitalized Patients With COVID-19 | -- | Sponsors and Collaborators: University of Minnesota, International Network for Strategic Initiatives in Global HIV Trials (INSIGHT), et al.  Investigators: Prof. Jens Lundgren (Principal Investigator), Prof. James Neaton (Study Chair) | People aged over 18 (Adult, Older Adult) are eligible. Participants are required to have positive test for COVID-19 and progressive disease suggestive of ongoing COVID-19 infection and symptoms of COVID-19 for ≤ 12 days. Besides, they require admission to hospital for acute medical care. | This study looks at the safety and effectiveness of different drugs in treating COVID-19 in people who have been hospitalized with the infection. Participants in the study will be treated with either a study drug plus current standard of care (SOC), or with placebo plus current SOC.  Study type: Interventional (Clinical Trial), phase 3  Actual enrollment: 2753  Methods: Randomized allocation, using the intervention model of parallel assignment. Measure the time of patients from randomization to sustained recovery (Time Frame: Up to Day 90).  Date: August 4, 2020 (actual study start date)- April 6, 2022 (actual study completion date) | No Study Results Posted on ClinicalTrials.gov |
| Experimental: Atorvastatin + L-arginine + Folic acid + Nicorandil + Nebivolol;  Placebo Comparator. | NCT04631536 | Managing Endothelial Dysfunction in COVID-19 : A Randomized Controlled Trial at the Lebanese American University Medical Center- Rizk Hospital | -- | Sponsors and Collaborators: Lebanese American University Medical Center | People aged over 18 (Adult, Older Adult) are eligible. Participants should be admitted for inpatient treatment of COVID-19 infection. | The study would help determine the potential therapeutic effect of the endothelial protocol as adjunct to mainstream management.  Study type: Interventional (Clinical Trial), phase 3  Actual enrollment: 42  Methods: Randomized allocation, using the intervention model of parallel assignment. Record clinical improvement (Time Frame: From date of intervention administration until the date of discharge from hospital or date of death from any cause, whichever came first, assessed up to 1 month).  Date: January 10, 2021 (actual study start date)-July 1, 2022 (estimated study completion date) | No Study Results Posted on ClinicalTrials.gov |
| Drug: Remdesivir  Drug: Lopinavir/ritonavir  Drug: Interferon Beta-1A  Drug: Hydroxychloroquine  Other: Standard of care  Drug: AZD7442  Other: Placebo | NCT04315948 | Multi-centre, Adaptive, Randomized Trial of the Safety and Efficacy of Treatments of COVID-19 in Hospitalized Adults | -- | Sponsors and Collaborators: Institut National de la Santé Et de la Recherche Médicale, France  Study Chair: Florence Ader, MD (Hospices Civils de Lyon) | People aged over 18 (Adult, Older Adult) are eligible. Participants should be hospitalized, and the time between onset of symptoms and randomization should be less than 11 days. | DisCoVeRy is a randomized controlled trial among adults (≥18-year-old) hospitalized for COVID-19. This study is an adaptive, randomized, open or blinded, depending on the drug to be evaluated, clinical trial to evaluate the safety and efficacy of possible therapeutic agents in hospitalized adult patients diagnosed with COVID-19. If one therapy proves to be superior to others in the trial, this treatment may become part of the SoC for comparison(s) with new experimental treatment(s).  Study type: Interventional (Clinical Trial), phase 3  Estimated Enrollment: 2416  Methods: Randomized allocation, using the intervention model of parallel assignment. Record percentage of subjects reporting each severity rating on a 7-point ordinal scale (time frame: day 15).  Date: March 22, 2020 (actual study start date)-October 2023 (estimated study completion date) | In previous versions of the DisCoVeRy protocol, remdesivir, lopinavir/ritonavir with or without interferon ß-1a and hydroxychloroquine were evaluated as potential treatments for COVID-19. These treatments have been discontinued based on analyses review by both DSMC/DSMB, the Solidarity Executive Group and the DisCoVeRy steering committee.  This version of the protocol, therefore, describes a randomized blinded placebo-controlled trial among adults (≥18-year-old) hospitalized for COVID-19 that randomly allocates them (1:1 ratio) between 2 arms: SoC + placebo versus SoC + AZD7442.  A global independent data and safety monitoring board (DSMB) monitors interim data to make recommendations about early study closure or changes to conduct, including adding or removing treatment arms. However, the current version of the protocol does not allow for efficacy or futility analysis, and the ability to add trial arms will be limited by the study being blinded and placebo-controlled during the investigation of AZD7442.  No Study Results Posted on ClinicalTrials.gov |
| Biological: bamlanivimab 7000mg  Biological: BRII-196+BRII-198  Biological: AZD7442 (IV)  Biological: AZD7442 (IM)  Drug: SNG001  Drug: Camostat  Biological: BMS-986414 + BMS-986413  Biological: SAB-185 (3,840 Units/kg)  Biological: SAB-185 (10,240 Units/kg)  Drug: CASIRIVIMAB + IMDEVIMAB  Drug: Placebo for Bamlanivimab 7000mg  Drug: Placebo for Bamlanivimab 700mg  Drug: Placebo for BRII-196+BRII-198  Drug: Placebo for SNG001  Drug: Placebo for Camostat  Drug: Placebo for SAB-185 (low dose)  Drug: Placebo for BMS-986414 + BMS-986413  Drug: Placebo for AZD7442 (IV)  Drug: Placebo for AZD7442 (IM)  Drug: Placebo for SAB-185 (high dose)  Biological: bamlanivimab 700mg | NCT04518410 | Adaptive Platform Treatment Trial for Outpatients With COVID-19 (Adapt Out COVID) | -- | Sponsors and Collaborators: National Institute of Allergy and Infectious, Diseases (NIAID), Eli Lilly and Company, AIDS Clinical Trials Group, Brii Biosciences Limited, AstraZeneca  Sagent Pharmaceuticals, Synairgen Research Ltd., Bristol-Myers Squibb, SAb Biotherapeutics, Inc.  Study Chair: David Smith, MD, MAS University of California, San Diego | People who have tested positive for COVID-19 but who do not currently need hospitalization. People aged over 18 (Adult, Older Adult) are eligible. | There is currently an urgent need for one study to efficiently test multiple drugs from more than one company, in people who have tested positive for COVID-19 but who do not currently need hospitalization. This study looks at the safety and effectiveness of different drugs in treating COVID-19 in outpatients.  Study type: Interventional (Clinical Trial), phase 2&3  Actual Enrollment: 4044  Methods: Randomized allocation, using the intervention model of parallel assignment. In Phase II, participants in the study will be treated with either a study drug or with placebo. In protocol version 7.0, participants in Phase III of the study will be treated with either a study drug or active comparator drug. The primary outcome measures are: COVID-19 symptom duration (Phase 2, time frame: up to day 28), quantification of SARS-CoV-2 RNA (Phase 2, time frame: day 3, day 7, day 14), and proportion of participants with new adverse event (AE) ≥ Grade 3 (Phase 2&3, time frame: thru day 28).  Date: February 22, 2021 (actual study start date)-October 2022 (estimated study completion date) | No Study Results Posted on ClinicalTrials.gov |
